# Supplementary material for: Quantification of multiple simultaneously occurring nitrogen flows in the euphotic ocean
Source: Copernicus journal article supplement (doi:10.5194/bg-2016-298), 2016-08-02
Supplement: Supplementary file 1 [file bg-2016-298-supplement.pdf]

## Supplementary Information for:

Quantification of multiple simultaneously occurring nitrogen flows in the euphotic ocean  
by

Min Nina Xu, Yanhua Wu, Li Wei Zheng, Zhenzhen Zheng,  
Huade Zhao, Shuh-Ji Kao\*

### This file includes:

Legends for Supplementary Figures

Supplementary Figure 1. The STELLA model (Version 9.14) for high nutrient case.

Supplementary Figure 2. The STELLA model (Version 9.14) for low nutrient case.

### Legends for supplementary figures

**Supplementary Figure 1.** The STELLA model (Version 9.14) for high nutrient case. The  $F_i$  ( $i = 1\sim 8$ ) indicates rate of the relevant N processes. By multiplying  $F$  with corresponding time variable (i.e.,  $r_{NH_4}$ ,  $r_{NO_2}$ ,  $r_{NO_3}$  and  $r_{PN}$ ) the  $F$  of  $^{15}N$  (i.e.,  $F_{i15}$ ) can be obtained. Similarly,  $F_{i14}$  can be obtained by multiplying  $F$  by  $(1 - r)$ . Meanwhile,  $NH_4^+$ ,  $NO_2^-$ ,  $NO_3^-$  and  $PN$  pools were separated into two compartments (i.e.,  $^{14}N$  and  $^{15}N$ ). DON leakage is the residual of mass conservation.

**Supplementary Figure 2.** The STELLA model (Version 9.14) for low nutrient case. The  $F_i$  ( $i = 1\sim 6$ ) indicates rate of the relevant N processes. Yet,  $F_i$  is determined by rate constant ( $k_i$ ,  $i = 1\sim 5$ ) and reactant concentration, which is a time variable. Fractionation between  $^{14}N$  and  $^{15}N$  was not considered, thus,  $k_i$  is for both  $^{14}N$  and  $^{15}N$ . Similar to high nutrient case,  $NH_4^+$ ,  $NO_x^-$  and  $PN$  pools were separated into two compartments (i.e.,  $^{14}N$  and  $^{15}N$ ). DON leakage is the residual of mass conservation. The output, delta, in this case stands for  $\delta^{15}N$ .

### Supplementary figures

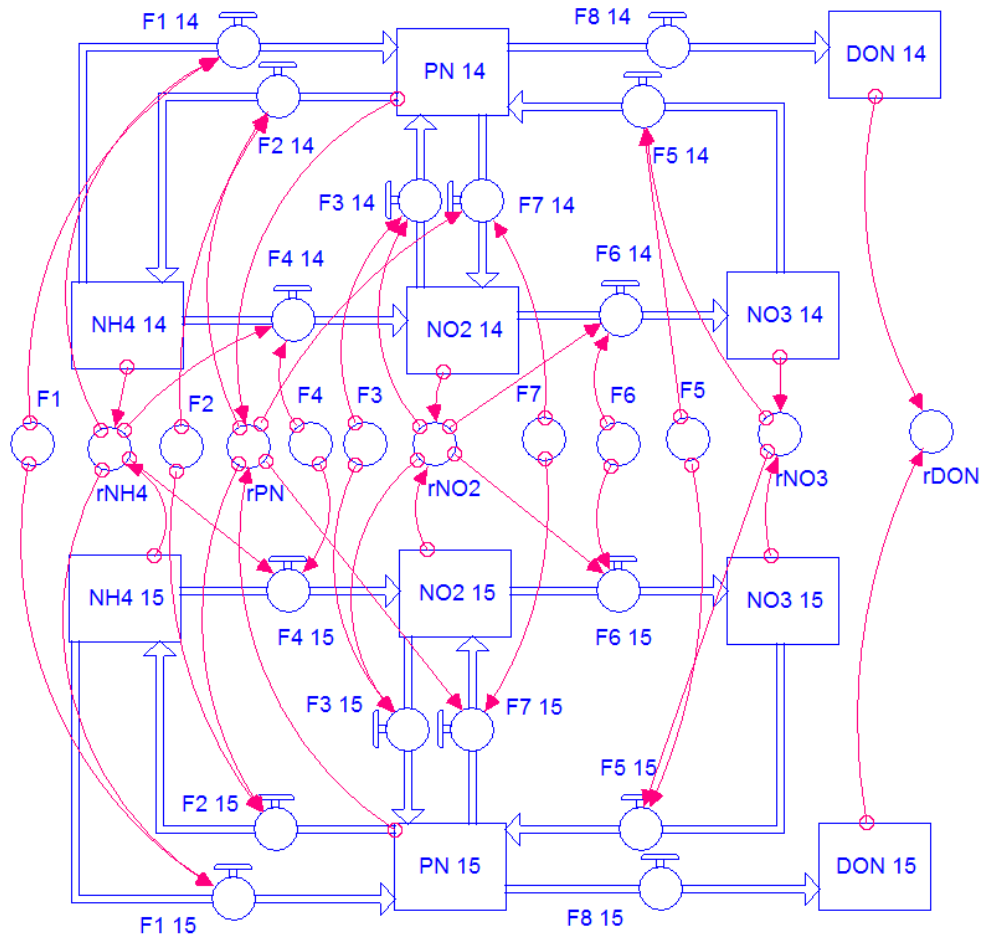

Fig. S1

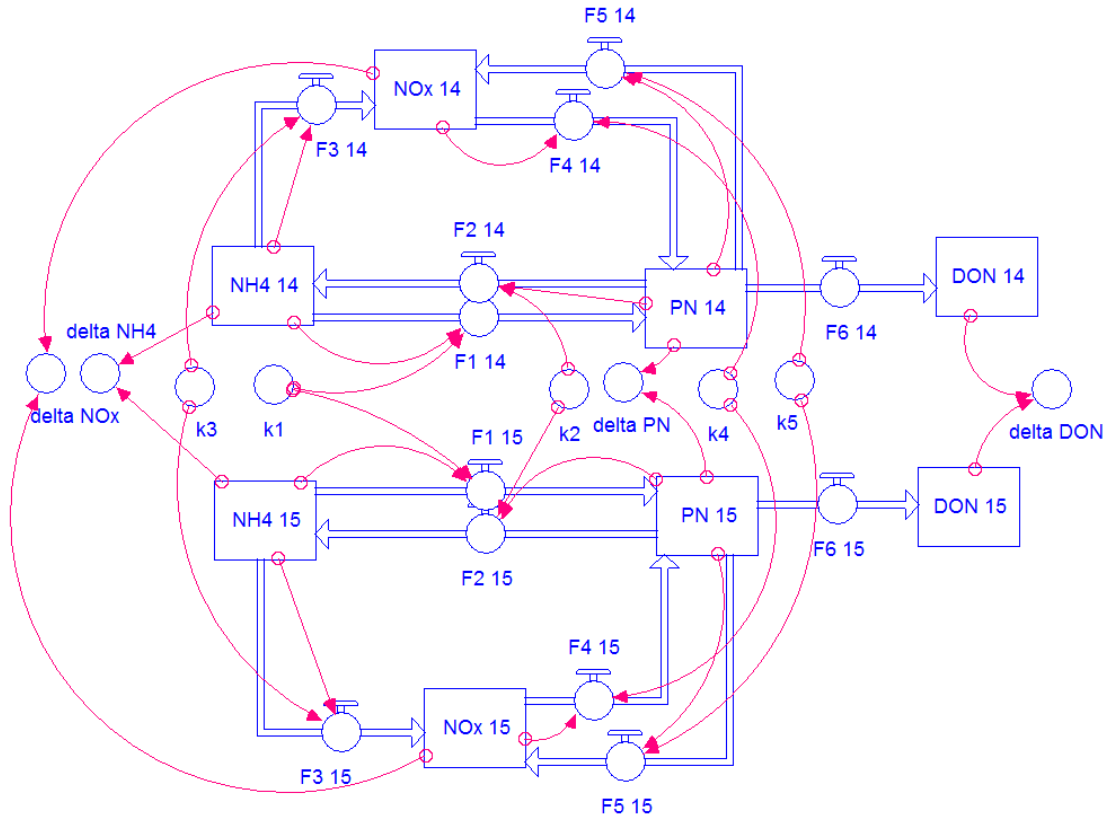

Fig. S2
